# Supplementary material for: Decision Support Systems Based on Gaseous Emissions and Their Impact on the Sustainability Assessment at the Livestock Farm Level: An Evaluation from the User’s Side
Source: MDPI journal article supplement (doi:10.3390/su151713041), 2023-08-29
Supplement: s1 [file s1]

# **Decision Support Systems Based on Gaseous Emissions and Their Impact on the Sustainability Assessment at the Livestock Farm Level: An Evaluation from the User's Side**

**Evangelos Alexandropoulos <sup>1,\*</sup>, Vasileios Anestis <sup>1,\*</sup>, Federico Dragoni <sup>2</sup>, Anja Hansen <sup>2</sup>, Saoirse Cummins <sup>3</sup>, Donal O'Brien <sup>3</sup>, Barbara Amon <sup>2,4</sup> and Thomas Bartzanas <sup>1</sup>**

<sup>1</sup> Department of Natural Resources Development and Agricultural Engineering, Agricultural University of Athens, Iera Odos 75, 11855 Athens, Greece; t.bartzanas@aua.gr

<sup>2</sup> Leibniz-Institute for Agricultural Engineering and Bioeconomy (ATB), 14469 Potsdam, Germany

<sup>3</sup> Soils and Environment Research Centre, Irish Food and Agriculture Development Authority (TEAGASC), Johnstown Castle, Y35TC97 Wexford, Ireland

<sup>4</sup> Faculty of Civil Engineering, Architecture and Environmental Engineering, University of Zielona Góra, 65-417 Zielona Góra, Poland

\* Correspondence: vagalexandr1991@aua.gr (E.A.); vanestis@aua.gr (V.A.)

## **Supplementary Materials**

**Table S1.** General information about the GHG-based DS tools assessed.

| DS tool                                                        | Developer                                                                   | Year released | Language (user interface)                                      | Short description                                                                                                                                                                                                                                                              | Scope of application                                                 | Stated purpose                                                                                             | References for additional information |
|----------------------------------------------------------------|-----------------------------------------------------------------------------|---------------|----------------------------------------------------------------|--------------------------------------------------------------------------------------------------------------------------------------------------------------------------------------------------------------------------------------------------------------------------------|----------------------------------------------------------------------|------------------------------------------------------------------------------------------------------------|---------------------------------------|
| <b>Cool Farm Tool v2.0</b>                                     | University of Aberdeen and Cool Farm Alliance                               | 2013          | English                                                        | Started as an excel-based tool. Now, an intermediate level tool with simple environment that avoids high level data inputs.                                                                                                                                                    | Livestock and crop production                                        | Assessment of mitigation, Market access, Monitoring progress, Benchmarking, Reporting, Knowledge transfer  | [1,2]                                 |
| <b>FarmAC v1.8</b>                                             | Aarhus University                                                           | 2015          | English                                                        | Developed as part of the EU AnimalChange project.                                                                                                                                                                                                                              | Livestock and crop production                                        | Assessment of mitigation measures at the farm scale                                                        | [3,4]                                 |
| <b>Overseer v5.4</b>                                           | Overseer Ltd                                                                | 1996          | English                                                        | Overseer uses scientific models to analyse the impact of farm management on the flow of key nutrients through the farm system                                                                                                                                                  | Calculation of the nutrients that crops and pasture will use to grow | Assistance of farmers with nutrient flow management.                                                       | [5,6]                                 |
| <b>Carbon Navigator – Dairy/Beef*</b>                          | Teagasc, Bord Bia                                                           | 2013-14       | English                                                        | Online farm-scale decision support tools that assist producers sustainably reduce the greenhouse gas emission intensity of primary milk production and beef.. It quantifies the relative impact mitigation practices have on a farm's GHG emission intensity and profitability | Agri-food sector, specifically dairy and beef cattle production      | Knowledge transfer, Benchmarking, Market access, Monitoring progress                                       | [7–10]                                |
| <b>KSNL - Kriteriensystem Nachhaltige Landwirtschaft</b>       | KTBL and others (TLL)                                                       | 2008          | German                                                         | It enables agricultural businesses to undergo a comprehensive sustainability analysis in order to identify weaknesses and to derive recommendations for action.                                                                                                                | Agri-food sector in general                                          | Knowledge transfer, Assessment, Market access, Monitoring progress, Certification                          | [11–13]                               |
| <b>SAFA v2.2.41</b>                                            | FAO                                                                         | 2014          | English                                                        | It refers to Sustainability Assessment of Food and Agriculture Systems (based on FAO's guidance for sustainable systems)                                                                                                                                                       | Agri-food sector in general                                          | Assessment, Market access, Benchmarking, Reporting                                                         | [14,15]                               |
| <b>RISE v3.0 - Response-Inducing Sustainability Evaluation</b> | HAFL - University of Agricultural, Forestry and Food Sciences (Switzerland) | 2015          | English, German, French, Spanish, Turkish, Indonesian, Danish, | Computer-based method by which the sustainability of agricultural holdings can be assessed holistically. Based on ten indicators, takes ecological, economic and social aspects into account                                                                                   | Agri-food sector in general                                          | Assessment, Market access, Monitoring progress, Benchmarking, Reporting, Knowledge transfer, Certification | [16,17]                               |

|                                                                                                  |                                                         |                                                              |                                                                   |                                                                                                                                                          |                                                                                    |                                                                                   |         |
|--------------------------------------------------------------------------------------------------|---------------------------------------------------------|--------------------------------------------------------------|-------------------------------------------------------------------|----------------------------------------------------------------------------------------------------------------------------------------------------------|------------------------------------------------------------------------------------|-----------------------------------------------------------------------------------|---------|
| <b>BEK v1.0 - Berechnungsstandard für einzelbetriebliche Klimabilanzen in der Landwirtschaft</b> | LWK Lower Saxony Thuenen-Institut, KTBL, ATB and others | 2016                                                         | Portuguese, Polish<br>German, English version to be released soon | Standard for carbon footprints at farm level in Germany, consists of (a) methodology description, (b) OA standard parameter list, (c) example xlsx files | Agri-food sector in general (mostly animal production, biogas and crop production) | Knowledge transfer, Benchmarking, Assessment, Monitoring progress, Certification  | [11,12] |
| <b>DLG-Nachhaltigkeitsstandard (based on REPRO)</b>                                              | DLG                                                     | 2013                                                         | German                                                            | Farm-scale assessment in the food and non-food sector, providing a uniform method for certifying and assessing sustainability in agriculture             | Agri-food sector in general                                                        | Knowledge transfer, Assessment, Market access, Monitoring progress, Certification | [18,19] |
| <b>HOLOS v4.0</b>                                                                                | Agricultural and Agrifood Canada                        | 2008 (as HOLOS v 1.1). The methodology was published in 2006 | English                                                           | This tool was designed to encourage users to explore possible ways of reducing greenhouse gas emissions from farms                                       | Agri-food sector in general- Especially livestock and crop production              | Exploratory tool, Reporting, Knowledge transfer, Monitoring progress, Assessment  | [20]    |
| <b>EX-ACT v9.0</b>                                                                               | FAO                                                     | 2009 (9 <sup>th</sup> version in 2022)                       | English                                                           | The EX-ACT providing estimates of the impact of agricultural and forestry sectors on carbon footprint.                                                   | Agri-Food sector. Livestock and crop production                                    | Benchmarking, Reporting, Knowledge transfer, Monitoring progress, Assessment      | [21,22] |
| <b>GLEAM v2.0 (GLEAM-I)</b>                                                                      | FAO                                                     | 2009 first version of GLEAM.                                 | English                                                           | GLEAM-i is the first open and livestock specific tool designed to stakeholders to calculate greenhouse gas emissions using IPCC Tier 2 methods.          | Agri-Food sector. Livestock and crop production                                    | Benchmarking, Reporting, Knowledge transfer, Monitoring progress, Assessment      | [23,24] |

\* The Carbon Navigator (Dairy, Beef) tools are considered as one in the evaluation process, since their functions are similar.

## References

1. Cool Farm Alliance Cool Farm Tool. Available online: <https://coolfarmtool.org/> (accessed on 10 July 2023).
2. Cool Farm Alliance Cool Farm Guidance. Available online: <https://coolfarm.org/resources/> (accessed on 10 July 2023).
3. Aarhus University FarmAC. Available online: <https://www.farmac.dk/> (accessed on 10 July 2023).
4. Aarhus University FarmAC. Guidance. Available online: <https://web04.agro.au.dk/projectnet/farmac/Pages/FarmAC%20users%20guide%20v3.htm> (accessed on 10 July 2023).
5. Overseer Limited Overseer. Available online: <https://www.overseer.org.nz/> (accessed on 10 July 2023).
6. Overseer Limited Overseer Support and Training. Available online: <https://www.overseer.org.nz/support-and-training> (accessed on 10 July 2023).
7. Bord Bia BORD BIA. Available online: <https://qas.bordbia.ie/Login.aspx?ReturnUrl=%2F> (accessed 10 July 2023).
8. Teagasc; Bord Bia. The Carbon Navigator Dairy. 2019. Available online: <https://www.teagasc.ie/publications/2019/the-dairy-carbon-navigator.php> (accessed 10 July 2023).
9. Buckley, C.; Donnellan, T.; Dillon, E.; Hanrahan, K.; Moran, B.; Ryan, M.; Curley, A.; Deane, L.; Delaney, L.; Harnett, P.; et al. *Teagasc National Farm Survey 2017 Sustainability Report*; Athenry, Co.: Galway, Ireland, 2019; ISBN 978-1-84170-650-4.
10. Teagasc The Carbon Navigator Beef. Available online: <https://www.teagasc.ie/publications/2019/the-beef-carbon-navigator.php> (accessed on 10 July 2023).
11. Effenberger, M.; Gödeke, K.; Grebe, S.; Haenel, H.-D.; Hansen, A.; Häußermann, U.; Kätsch, S.; Lasar, A.; Nyfeler-Brunner, A.; Osterburg, B.; et al. *Berechnungsstandard Für Einzelbetriebliche Klimabilanzen (BEK) in Der Landwirtschaft*; KTBL: Darmstadt, Germany, 2016.
12. KTBL AG BEK (2016): Berechnungsstandard Für Einzelbetriebliche Klimabilanzen (BEK) in Der Landwirtschaft. Berechnungsparameter Für Einzelbetriebliche Klimabilanzen. Darmstadt, Kuratorium Für Technik Und Bauwesen in Der Landwirtschaft (KTBL). Available online: <https://www.ktbl.de/themen/bek> (accessed on 10 July 2023).
13. Breitschuh, T.; Breitschuh, G.; Eckert, H.; Gernand, U.; Geyer, M. *Betriebsbewertungssystem KSNL—Anwendung und Ausgewählte Kriterien*; KTBL: Darmstadt, Germany, 2019; pp. 1–15.
14. FAO SAFA. Available online: <http://www.fao.org/nr/sustainability/sustainability-assessments-safa/safa-tool/en/> (accessed on 10 July 2023).
15. FAO. *Food and Agricultural Organization of United Nations: Sustainability Pathways*; FAO: Rome, Italy, 2016; Volume 45.
16. Grenz, J.; Mainiero, R.; Schoch, M.; Sereke, F.; Stalder, S.; Thalmann, C.; Wyss, R. *RISE 3.0—Manual*; Bern University of Applied Sciences: Bern, Switzerland, 2018; p. 113.
17. Grenz, J.; Thalmann, C.; Heeb, L.; Schoch, M.; Kaufmann, M.; Wyss, R. *RISE 3.0—Software Manual*; Bern University of Applied Sciences: Bern, Switzerland, 2016.
18. DLG e.V. DLG. Available online: <https://www.dlg-nachhaltigkeit.info/de/> (accessed on 10 July 2023).
19. Christen, O.; Deumelandt, P.; Erdle, K.; Packeiser, M.; Reinicke, F.; Daniels-Spangenberg, H. *Von Dlg Expert Knowledge Series*; DLG Committee: Frankfurt, Germany, 2017; Volume 369.
20. Government of Canada HOLOS. Available online: <https://agriculture.canada.ca/en/agricultural-production/holos-software-program> (accessed on 10 July 2023).
21. FAO EX-ACT. Available online: <https://www.fao.org/in-action/epic/ex-act-tool/suite-of-tools/ex-act/en/> (accessed on 10 July 2023).
22. Grever, U.; Bockel, L.; Schiettecatte, L.-S.; Bernoux, M. *Ex-Ante Carbon-Balance Tool (EX-ACT)*; FAO: Rome, Italy, 2017.
23. Howitt, M.; McManus, J. Stakeholder Management: An Instrument for Decision Making. *Manag. Serv.* **2012**, *56*, 29–34.
24. FAO. *GLEAM 2, 2016. Global Livestock Environmental Assessment Model*; FAO: Rome, Italy, 2018.
