# Supplementary material for: Decision Support Systems Based on Gaseous Emissions and Their Impact on the Sustainability Assessment at the Livestock Farm Level: An Evaluation from the User’s Side
Source: MDPI journal article supplement (doi:10.3390/su151713041), 2023-08-29
Supplement: s1 [file s1]

Archive with 1 entries (1 files):
- sustainability-2556282-supplementary.pdf
